# Supplementary material for: Synthesis of Aroma Compounds as a Function of Different Nitrogen Sources in Fermentations Using Non-Saccharomyces Wine Yeasts
Source: MDPI journal article supplement (doi:10.3390/microorganisms11010014), 2022-12-21
Supplement: s1 [file s1]

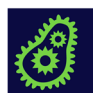

## Supplementary Materials:

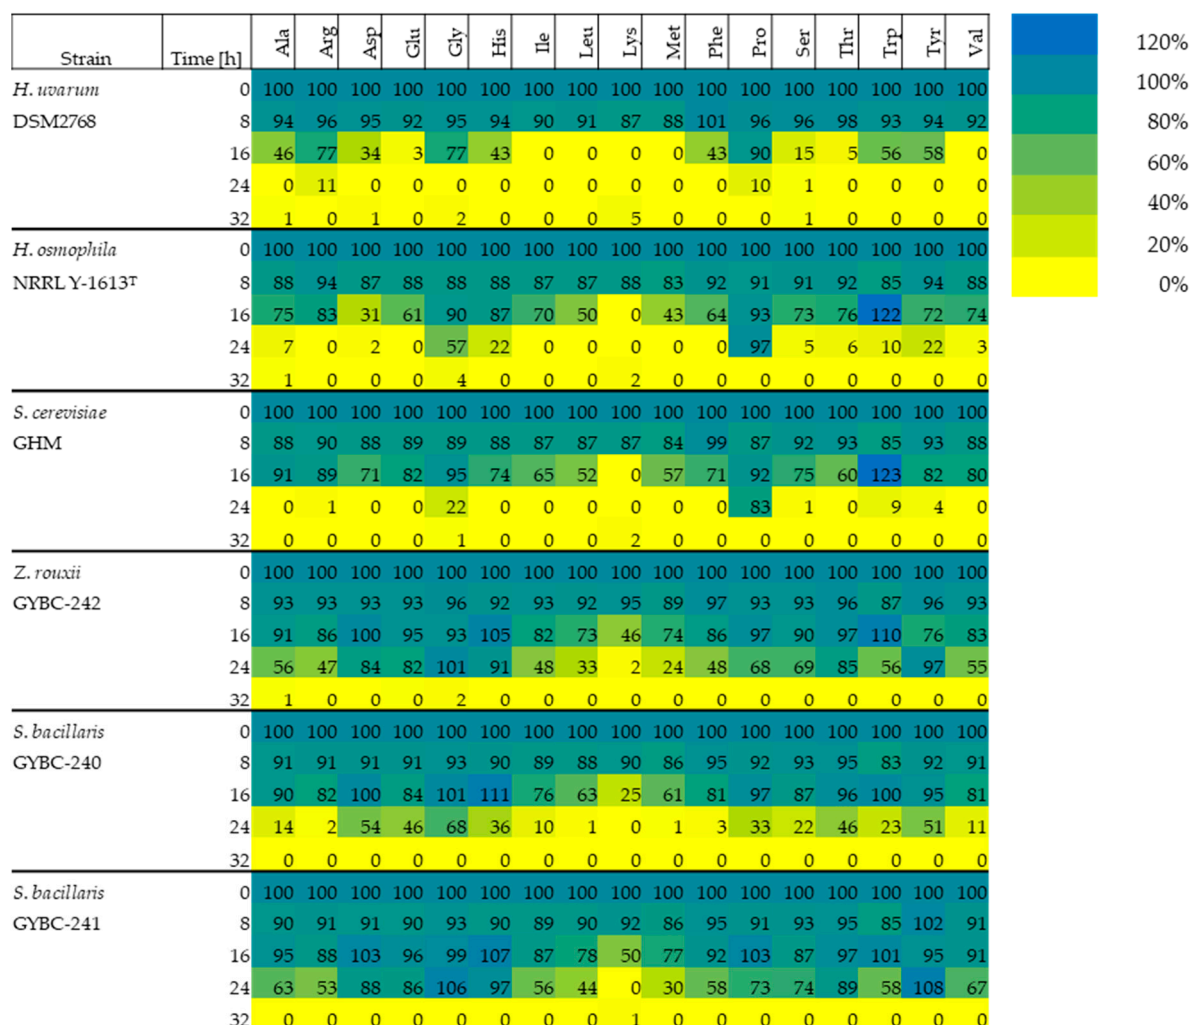

**Figure S1.** Amino acid concentration (%) present in the medium at different time points of the alcoholic fermentation in SM-mix. The initial concentration of each amino acid is expressed as 100%. It should be noted that the values of Glu also contained Gln and Asp also contained Asn. Cys could not be measured.

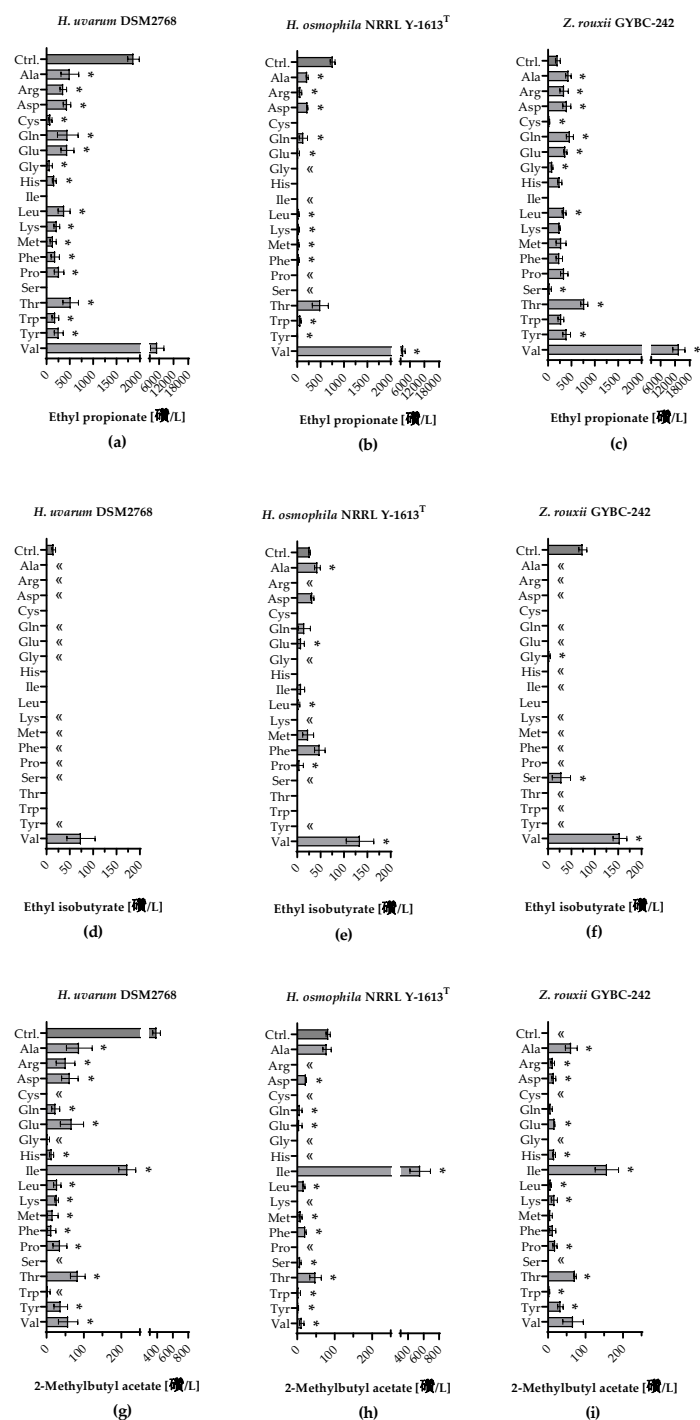

**Figure S2.** Formation of ethyl- and acetate esters during fermentation with individually supplemented amino acids. Formation of ethyl propionate [µg/L] in fermentations using (a) *H. uvarum* DSM2768, (b) *H. osmophila* NRRL Y-1613<sup>T</sup> and (c) *Z. rouxii* GYBC-242. Formation of ethyl isobutyrate [µg/L] in fermentations using (d) *H. uvarum* DSM2768, (e) *H. osmophila* NRRL Y-1613<sup>T</sup> and (f) *Z. rouxii* GYBC-242. Formation of 2-methylbutyl acetate [µg/L] in fermentations using (g) *H. uvarum* DSM2768, (h) *H. osmophila* NRRL Y-1613<sup>T</sup> and (i) *Z. rouxii* GYBC-242. Fermentations using the respective yeast with SM-mix served as control (Ctrl.). Higher alcohols were measured via HS-SPME-GC-MS analysis. Data are the mean of three independent experiments  $\pm$  SEM, two-tailed unpaired t test with Welch's correction, \* p < 0.05 as compared to the control. Error bars indicate the standard deviation; <math>\ll</math>: not quantifiable.

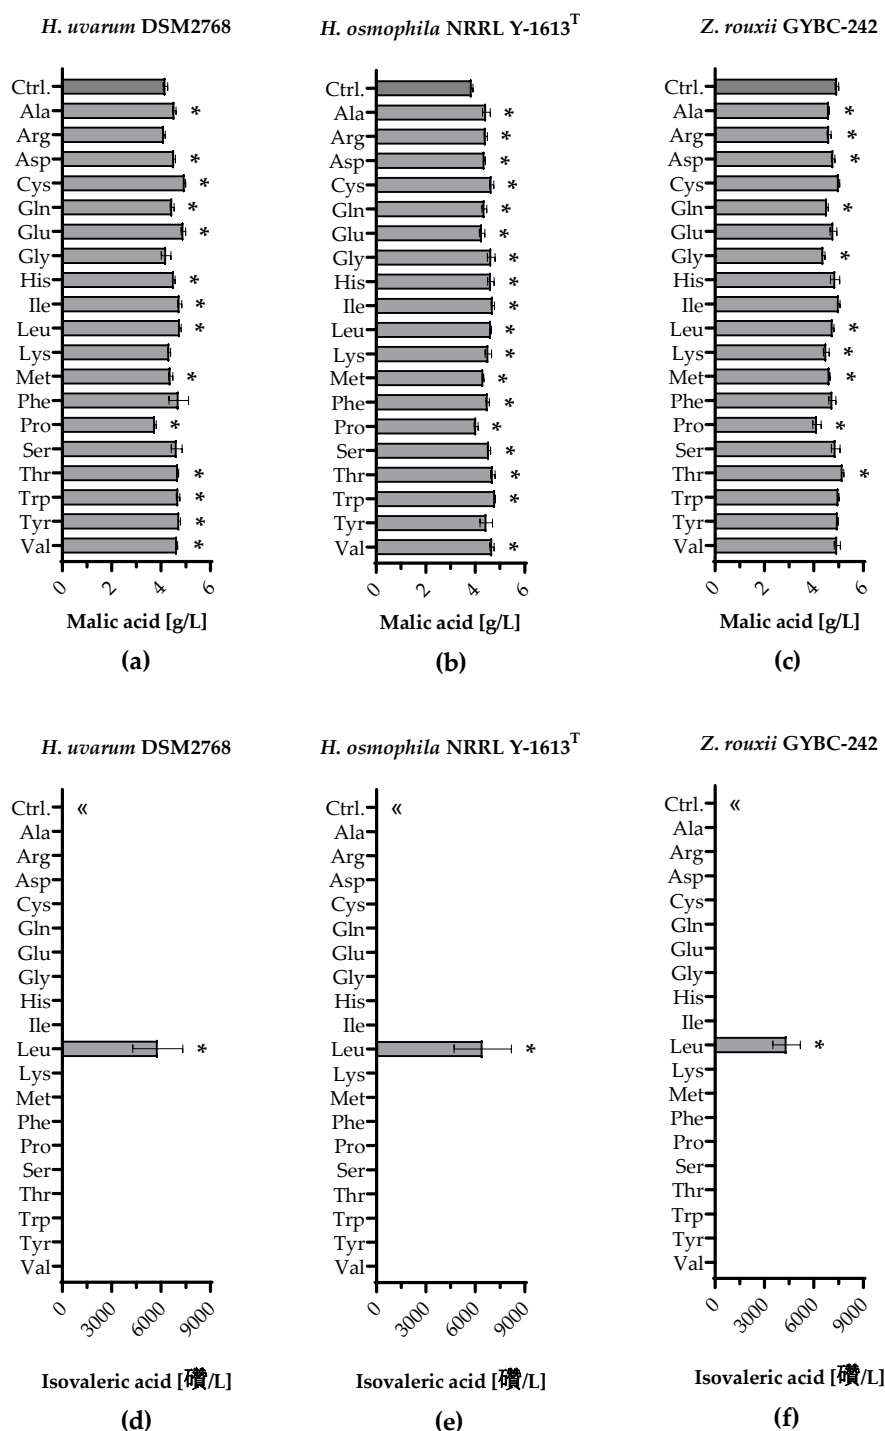

**Figure S3.** Acid production during fermentation with individually supplemented amino acids. Malic acid production [g/L] in fermentations using (a) *H. uvarum* DSM2768, (b) *H. osmophila* NRRL Y-1613<sup>T</sup> and (c) *Z. rouxii* GYBC-242. Isovaleric acid production [μg/L] in fermentations using (d) *H. uvarum* DSM2768, (e) *H. osmophila* NRRL Y-1613<sup>T</sup> and (f) *Z. rouxii* GYBC-242. Fermentations using the respective yeast with SM-mix served as control (Ctrl.). Higher alcohols were measured via HS-SPME-GC-MS analysis. Data are the mean of three independent experiments ± SEM, two-tailed unpaired t test with Welch's correction, \* p < 0.05 as compared to the control. Error bars indicate the standard deviation; «: not quantifiable.
